# Supplementary material for: Amino acid-assisted synthesis of superparamagnetic CoFe2O4 nanostructures for the selective adsorption of organic dyes
Source: Royal Society of Chemistry journal article supplement (doi:10.1039/c3ra40469b), 2013-01-01
Supplement: c3ra40469b.pdf [file c3ra40469b.pdf]

## Electronic Supplementary Information

# Amino acid-assisted synthesis of superparamagnetic $\text{CoFe}_2\text{O}_4$ nanostructures for the selective adsorption of organic dyes

Mingyan Dong,<sup>a</sup> Qiang Lin,<sup>a</sup> Dan Chen,<sup>a</sup> Xinning Fu,<sup>a</sup> Min Wang,<sup>a</sup> Qingzhi Wu,<sup>\*a</sup> Xiaohui Chen<sup>\*b</sup> and  
5 Shipu Li<sup>a</sup>

State Key Laboratory of Advanced Technology for Materials Synthesis and Processing, and  
Biomedical Materials and Engineering Center, Wuhan University of Technology, Wuhan 430070,  
China

Department of Prosthetic, School of Stomatology, Wuhan University, Wuhan 430079, China

10

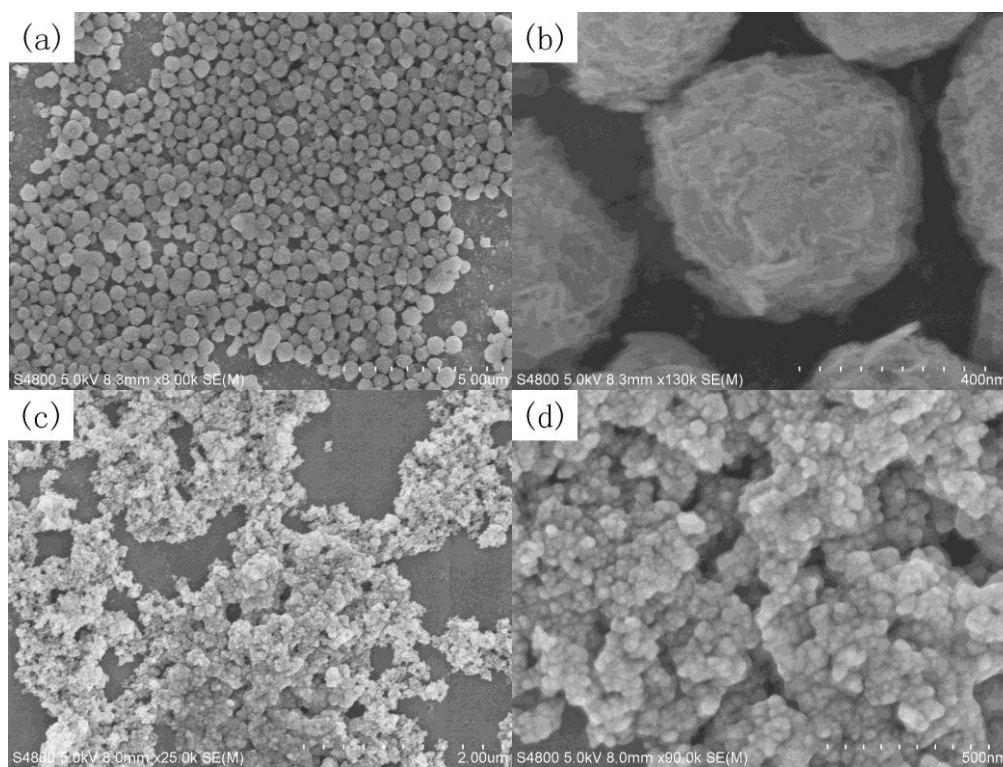

15 **Fig. S1** SEM images of samples synthesized in the absence of Lys using EG (a, b) and  $\text{H}_2\text{O}$  (c, d) as the solvent.

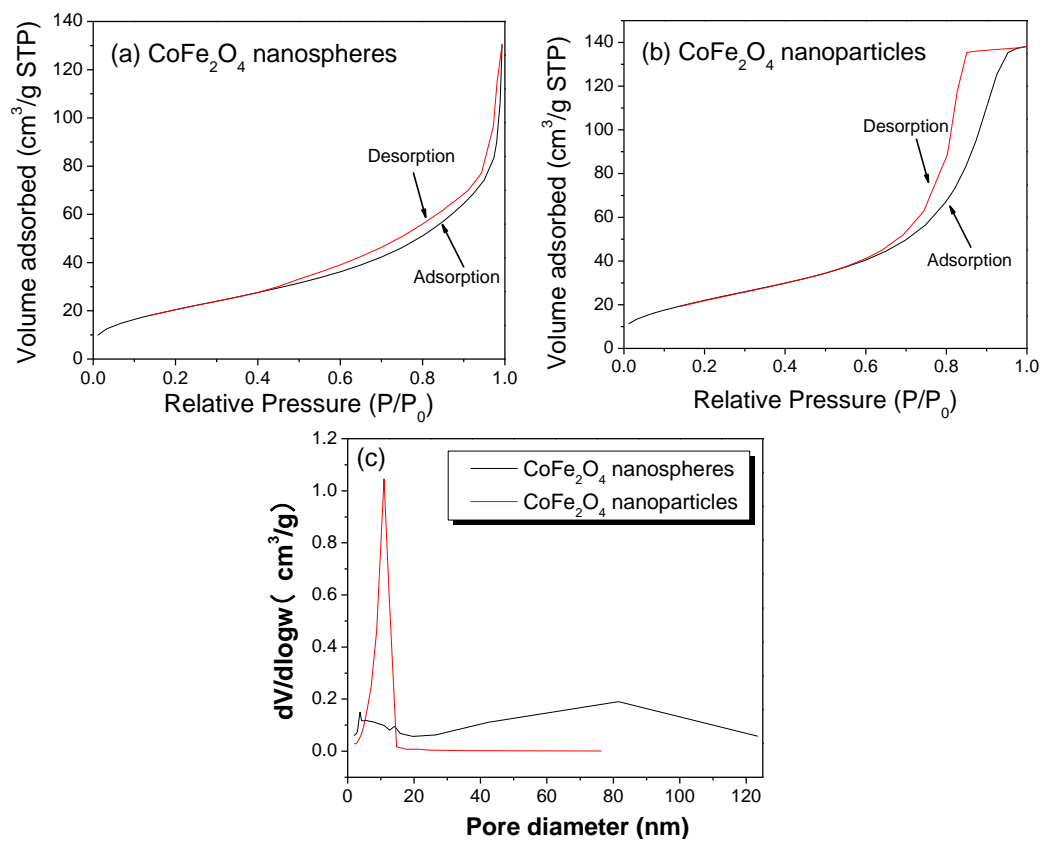

5

**Fig. S2** N<sub>2</sub> adsorption-desorption isotherm (a, b) and pore size distribution curve (c) of CoFe<sub>2</sub>O<sub>4</sub> nanostructures.

10
